# Supplementary material for: Exploring an azo-uracil based nickel(ii) complex for anticancer and phosphatase like activities
Source: Royal Society of Chemistry journal article supplement (doi:10.1039/d6ra01587e), 2026-04-02
Supplement: d6ra01587e1.pdf [file d6ra01587e1.pdf]

## **Electronic Supporting Information (ESI)**

### **Exploring Azo-Uracil Based Nickel(II) Complex for Anticancer and Phosphatase like Activities**

Subhasis Ghosh<sup>a</sup>, Samrat Daripa<sup>b</sup>, Sumit Kumar Hira<sup>b</sup>, Debasis Das\*

<sup>a</sup>Department of Chemistry; <sup>b</sup>Cellular Immunology Laboratory Department of Zoology, The University of Burdwan, Burdwan, 713104, W.B., India.

E-mail: [subhasisg456@gmail.com](mailto:subhasisg456@gmail.com) (S.Ghosh); [sdaripa40@gmail.com](mailto:sdaripa40@gmail.com) (S.Daripa); [sumit.hira2008@gmail.com](mailto:sumit.hira2008@gmail.com) (S. Hira); [ddas100in@yahoo.com](mailto:ddas100in@yahoo.com) (D. Das).

## **INDEX**

### **Figures**

**Fig. S1** ESI-MS spectrum of **N1**

**Fig. S2** FTIR spectrum of **N1**.

**Fig. S3** <sup>1</sup>HNMR spectrum of **N1** in DMSO-D<sub>6</sub>.

**Fig. S4** <sup>13</sup>CNMR spectrum of **L1** in DMSO-D<sub>6</sub>.

**Fig S5** <sup>13</sup>CNMR spectrum of **N1** in DMSO-D<sub>6</sub>

**Fig S6** Packing pattern of **N1**

**Fig. S7** Determination of rate constant for **N1** catalysed hydrolysis of **p-NPP**

**Fig. S8** ESI-MS spectrum of the [**N1** + **p-NPP**] system

**Fig S9** Comparison of cytotoxic and apoptotic effects of **N1** and free Ni<sup>2+</sup> ion.

### **Tables**

**Table S1** Crystal data and structure refinement for **N1**

**Table S2** Selected bond lengths [Å] and angles [°] for **N1**

**Table S3** Results from TD-DFT calculations on **L1**

**Table S4** Results from TD-DFT calculations on **N1**

**Table S5** Structural parameters of **L1** derived from TDDFT studies

**Table S6** Structural parameters of N1 derived from TDDFT studies

**Table S7** Structural parameters and relevant parameters for N1- *p*-NPP interaction from TDDFT studies

## 1. Materials and methods

1, 3-Dimethyl-6-aminouracil, *p*-amino benzoic acid has been purchased from SigmaAldrich (India). The solvents used are of spectroscopic grade. Other chemicals are of analytical reagent grade and used without further purification. Milli-Q Millipore 18.2 M $\Omega$  cm<sup>-1</sup> water is used whenever required. A Shimadzu Multi Spec 2450 spectrophotometer is used for recording UV–Vis. spectra. FTIR spectra are recorded on a Shimadzu FTIR (model IR Prestige 21 CE) spectrophotometer. Single crystal X-ray diffraction data has been collected on a Bruker X8 APEX-II CCD diffractometer at 100(2) K using graphite-monochromatic Mo-K $\alpha$  radiation (0.71073 Å) at 150K. The data are processed and corrected for Lorentz and polarization absorption effects. The structure is solved and refined using Bruker SHELXTL Software Package. All non-hydrogen atoms are refined with anisotropic thermal displacements. Hydrogen atoms are included in the structure factor calculation in geometrically idealized positions, with thermal parameters depending on the parent atom, using a riding model. Image was generated by Mercury software

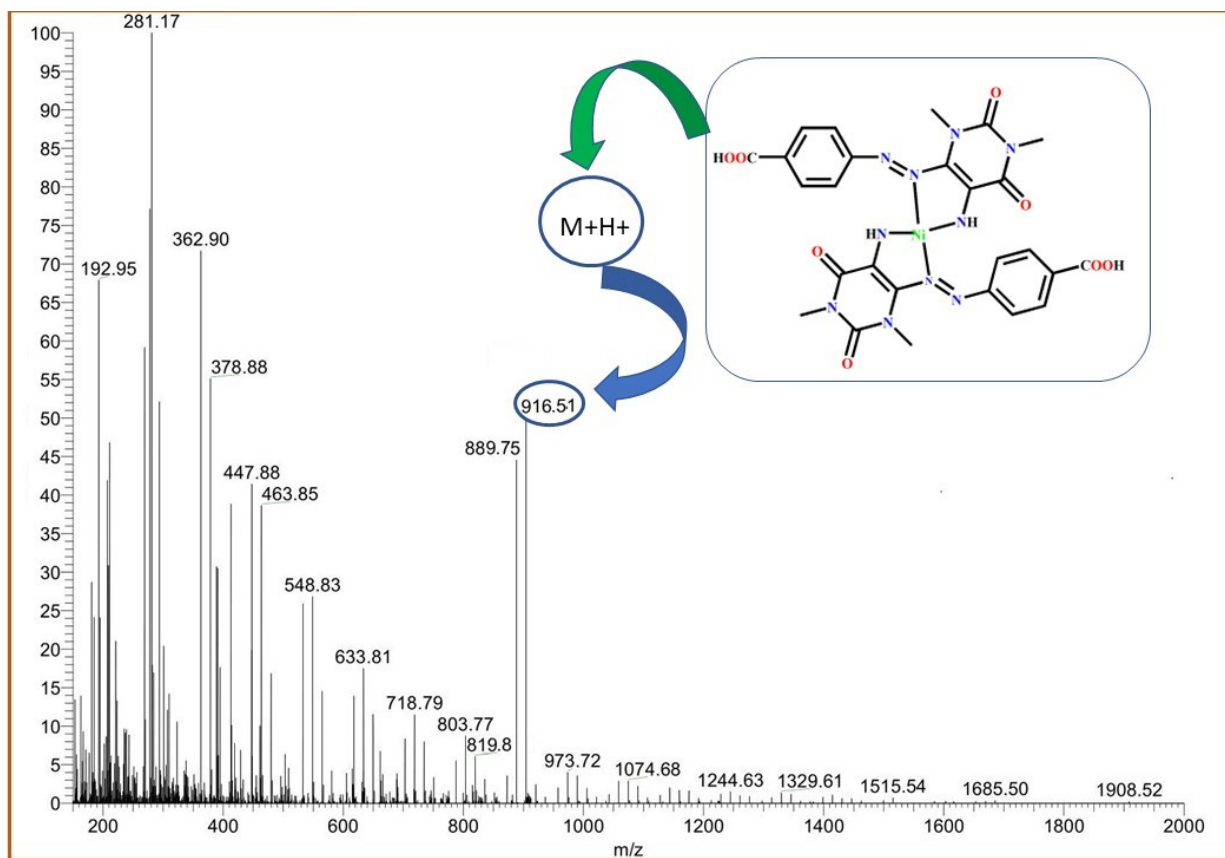

**Fig. S1** ESI-MS spectrum of N1

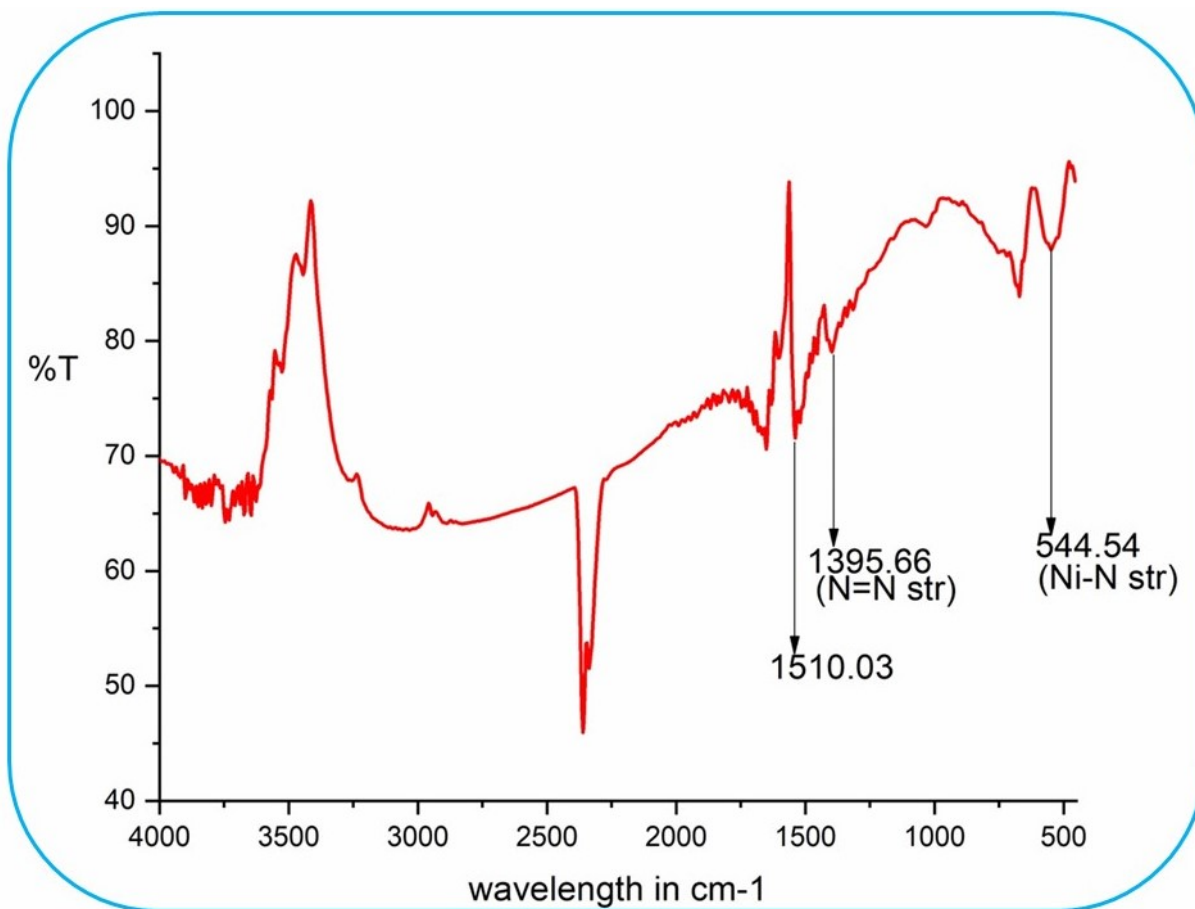

**Fig. S2** FTIR spectrum of N1

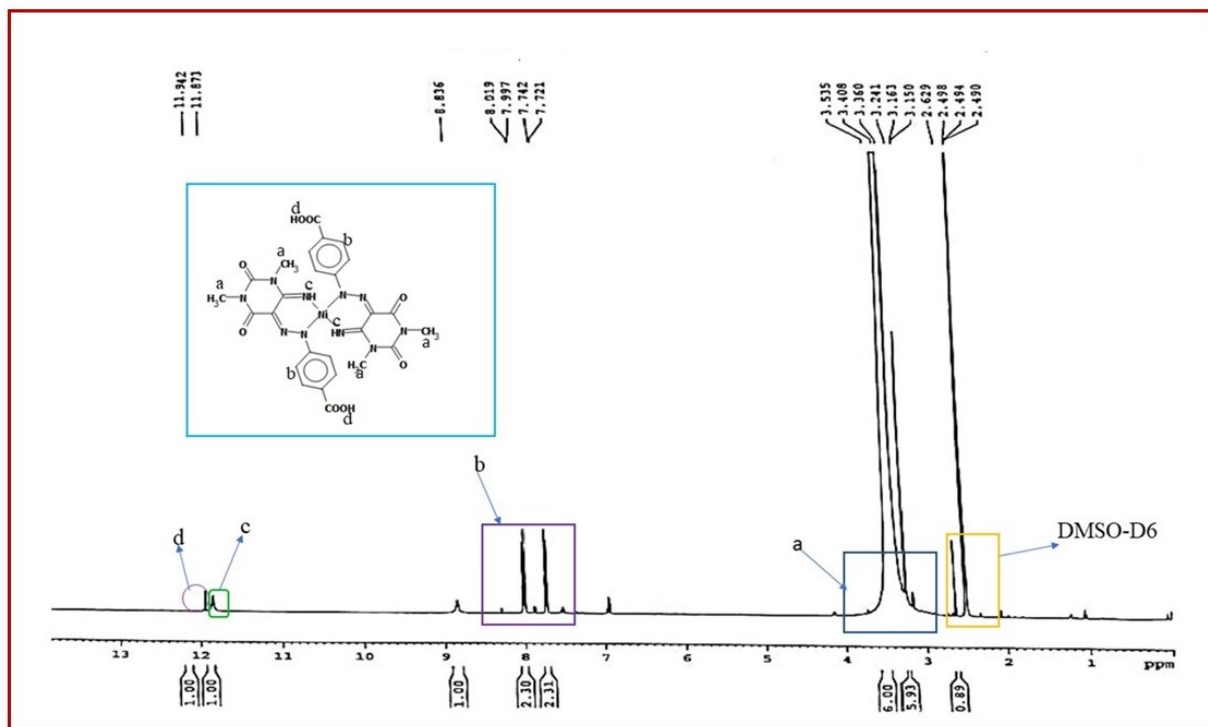

Fig. S3 <sup>1</sup>H NMR spectrum of N1

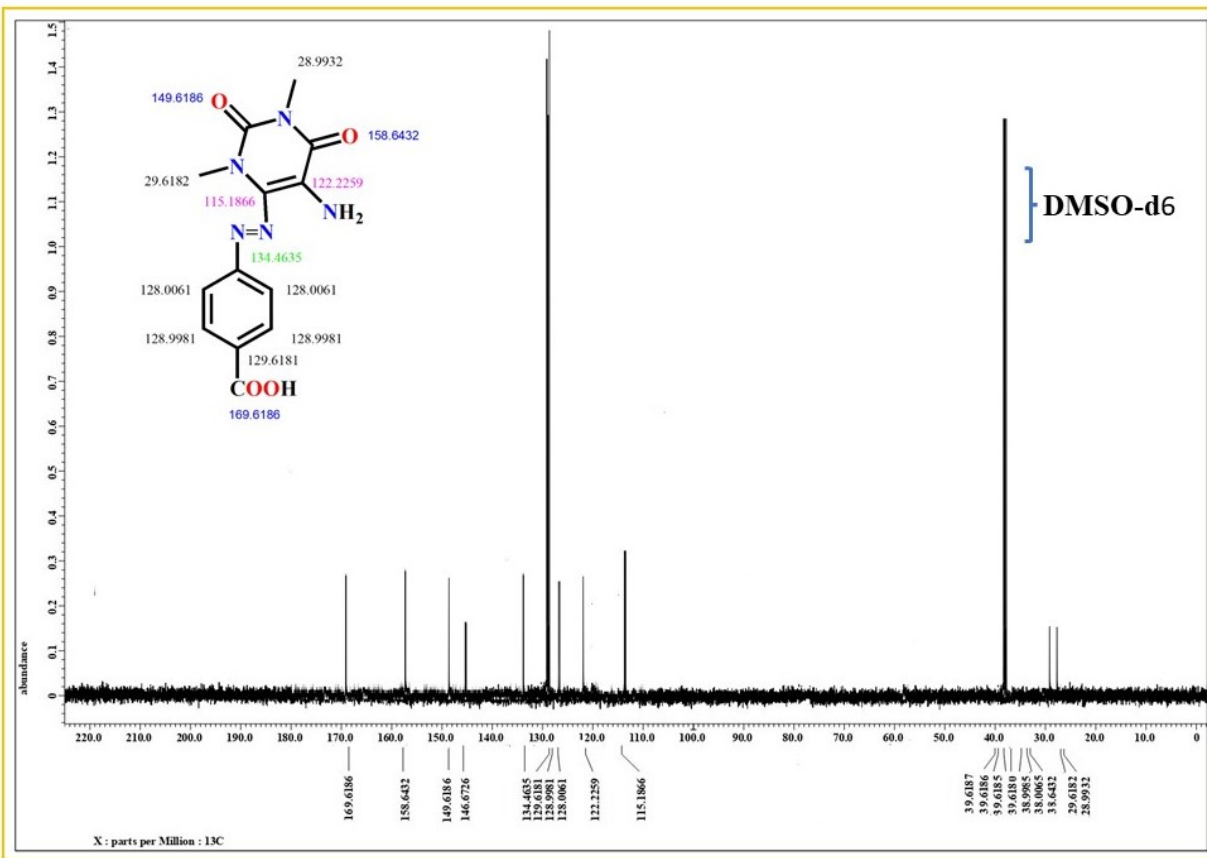

**Fig. S4**  $^{13}\text{C}$ NMR spectrum of L1 in DMSO-D6

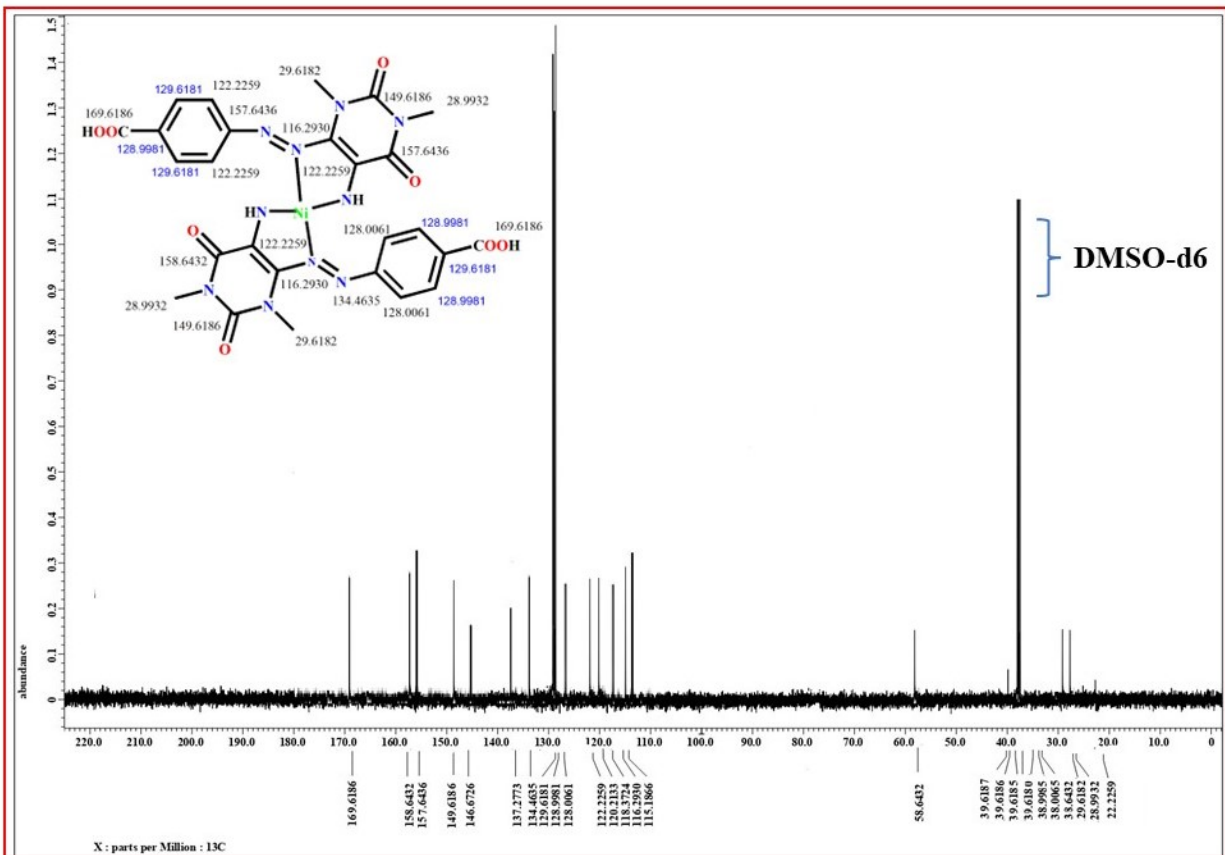

Fig. S5  $^{13}\text{C}$ NMR spectrum of N1 in DMSO-D6

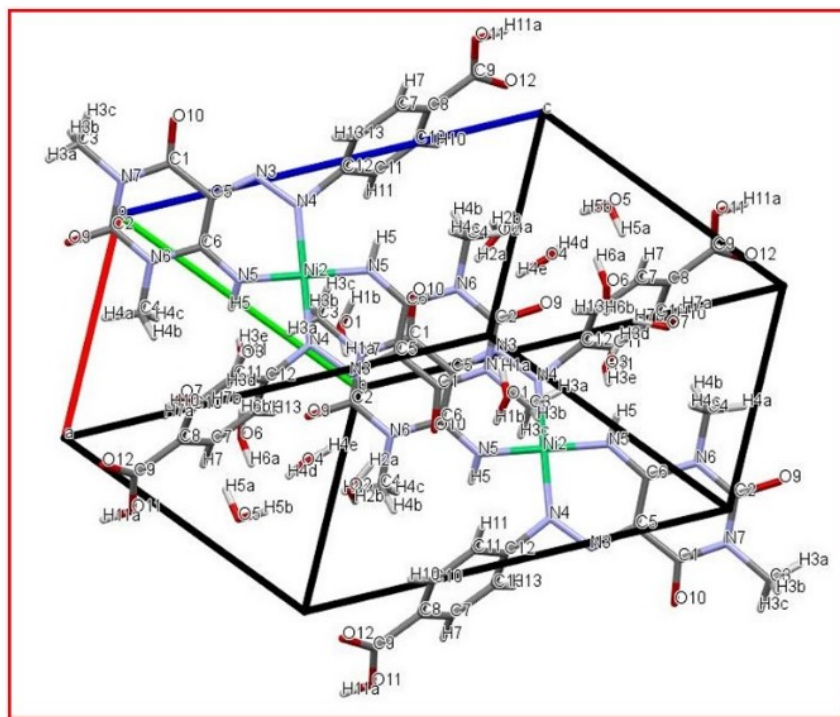

Fig. S6 Packing pattern of N1

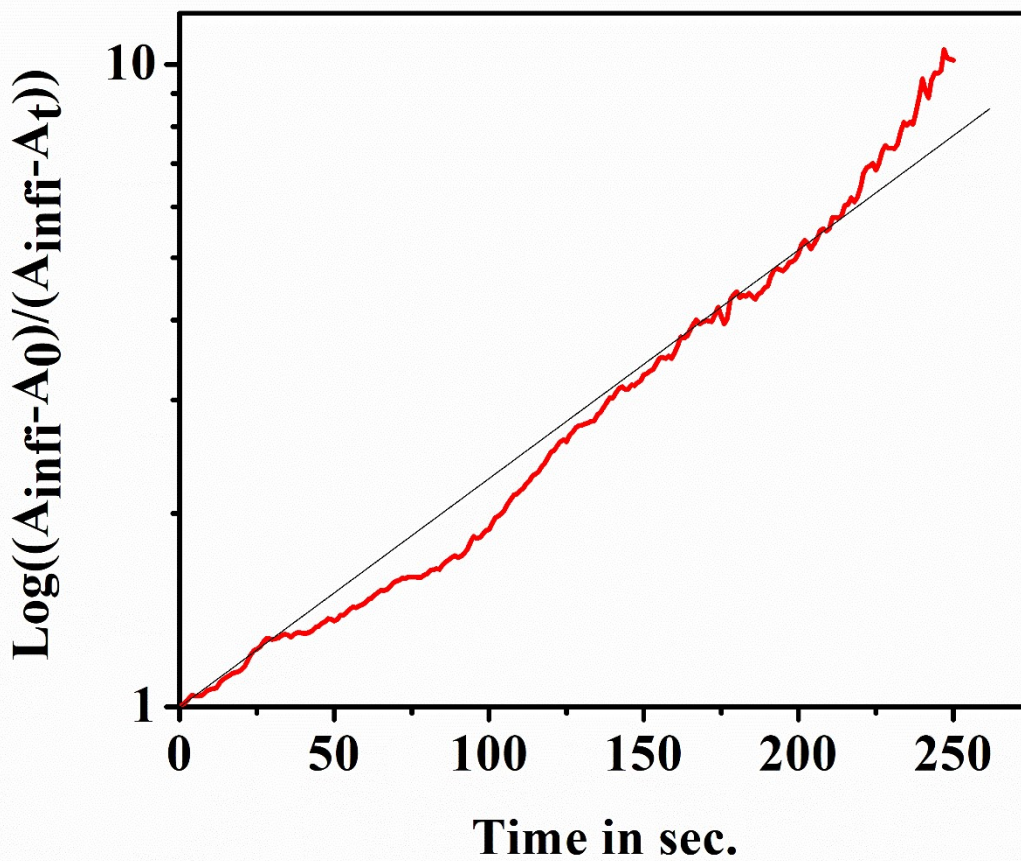

**Fig. S7** Determination of rate constant for the N1 (0.001 mmol) catalysed hydrolysis of *p*-NPP under pseudo first order condition (media: MeOH-H<sub>2</sub>O, 1:4, v/v, PBS buffer, pH 7.4, room temperature).

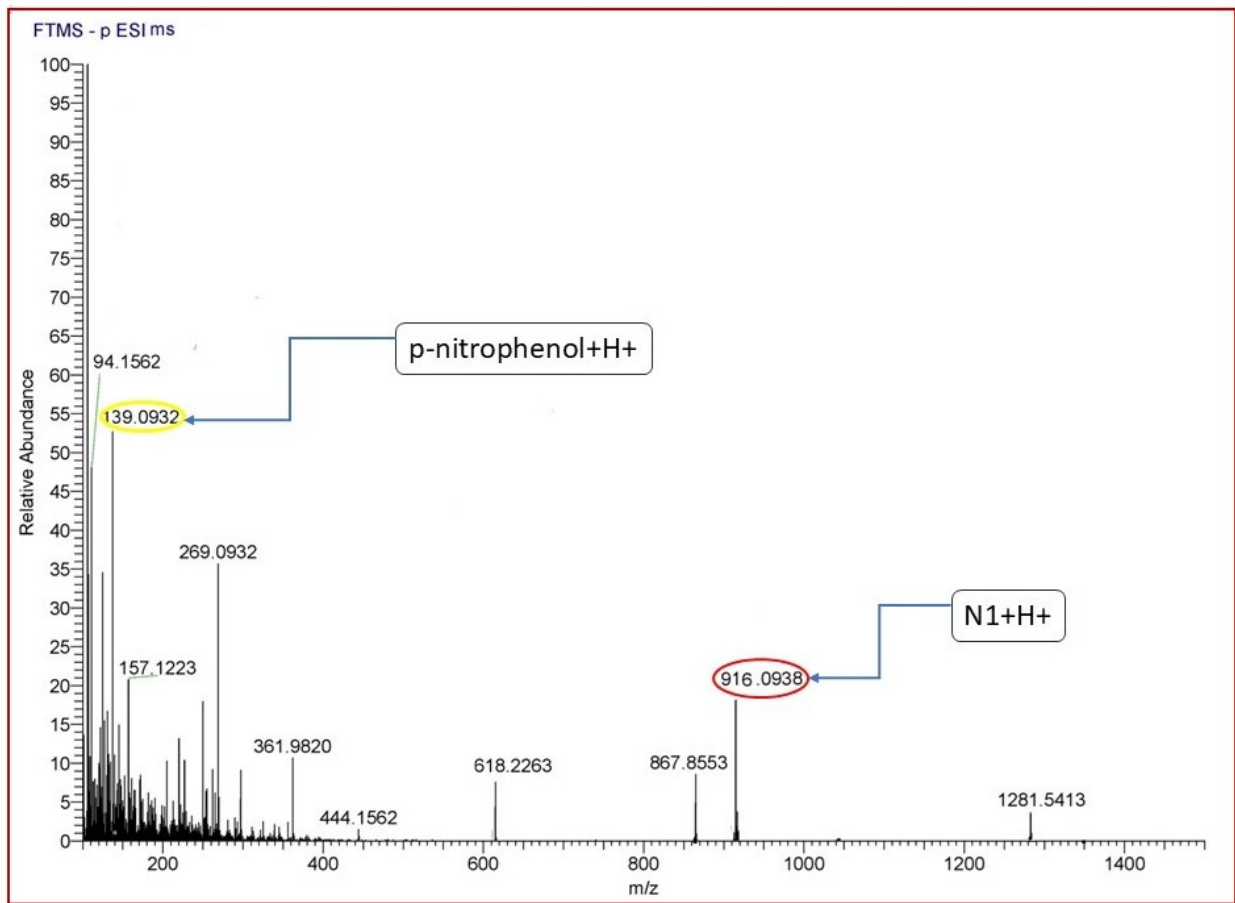

**Fig. S8** ESI-MS spectrum of the [N1+p-NPP] system

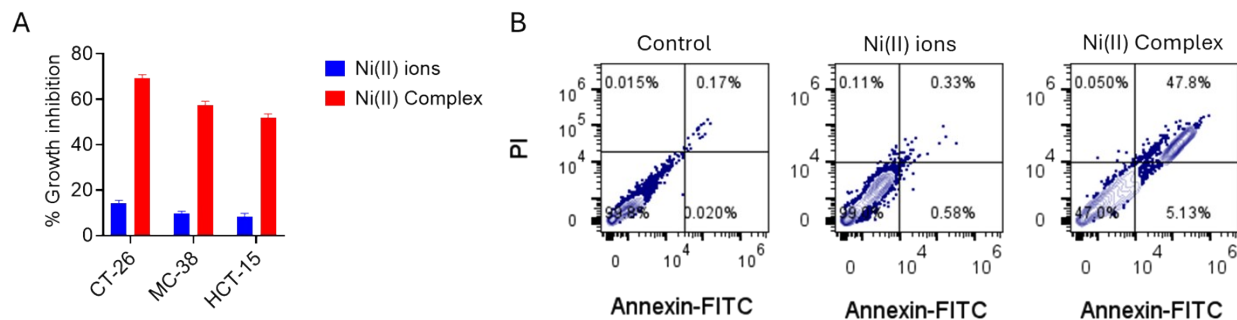

**Fig. S9 Comparison of cytotoxic and apoptotic effects of N1 and free Ni<sup>2+</sup>:** (A) Percentage cytotoxicity in CT26 cells treated with N1 and free Ni<sup>2+</sup> ion as [Ni(NO<sub>3</sub>)<sub>2</sub>·6H<sub>2</sub>O] at 0.04 μg mL<sup>-1</sup>, demonstrating significantly higher cytotoxicity of the N1 relative to the Ni<sup>2+</sup> salt alone. Data are expressed as mean ± SD (n = 3); (B) Representative flow cytometric dot plots of Annexin V–FITC/PI staining showing apoptotic populations in untreated control cells, free Ni<sup>2+</sup> treated cells, and N1 treated cells. Quadrants represent viable (Annexin V<sup>-</sup>/PI<sup>-</sup>), early apoptotic (Annexin V<sup>+</sup>/PI<sup>-</sup>), late apoptotic (Annexin V<sup>+</sup>/PI<sup>+</sup>), and necrotic (Annexin V<sup>-</sup>/PI<sup>+</sup>) cell populations. The N1 treated group shows a pronounced increase in apoptotic cells compared to free Ni<sup>2+</sup>, confirming that the observed biological activity predominantly arises from the N1. All experiments have been performed under identical conditions and analysed by flow cytometry.

**Table S1** Crystal data and structure refinement parameters for N1

| Parameters        | Data                                                                                                 |
|-------------------|------------------------------------------------------------------------------------------------------|
| CCDC              | 2003428                                                                                              |
| Empirical formula | C <sub>26</sub> H <sub>24</sub> N <sub>10</sub> Ni O <sub>8,7</sub> (H <sub>4</sub> O <sub>2</sub> ) |
| Formula weight    | 915.47                                                                                               |
| Crystal system    | Triclinic                                                                                            |
| Space group       | P -1                                                                                                 |
| Hall group        | -P 1                                                                                                 |
| Temperature       | 296 K                                                                                                |
| Wavelength        | 0.71073                                                                                              |
| <i>a</i> /Å       | 7.89(2)                                                                                              |
| <i>b</i> /Å       | 8.49(2)                                                                                              |
| <i>c</i> /Å       | 15.86(4)                                                                                             |
| <i>α</i> /°       | 80.77(4)                                                                                             |
| <i>β</i> /°       | 79.09(5)                                                                                             |
| <i>γ</i> /°       | 89.38(4)                                                                                             |

|                                        |               |
|----------------------------------------|---------------|
| Volume/Å <sup>3</sup>                  | 1030(4)       |
| Z                                      | 1             |
| ρ <sub>calc</sub> g/cm <sup>3</sup>    | 1.436         |
| μ/mm <sup>-1</sup>                     | 0.565         |
| F(000)                                 | 482           |
| F(000')                                | 482.62        |
| Θ <sub>max</sub>                       | 24.26         |
| Index ranges (h, k, l <sub>max</sub> ) | 9,9,18        |
| Reflections collected (R)              | 0.1031(1234)  |
| wR <sub>2</sub> (Reflection)           | 0.2471( 1945) |
| S                                      | 1.151         |
| N <sub>par</sub>                       | 292           |
| Data completeness                      | 1.000         |

**Table S2** Selected bond lengths [Å] and angles [°] for **N1**

| Atoms  | Bond length (Å) | Atoms      | Bond angle (°) |
|--------|-----------------|------------|----------------|
| Ni2 N5 | 1.828(12)       | N5 Ni2 N4  | 87.9(5)        |
| Ni2 N5 | 1.828(12)       | N5 Ni2 N4  | 92.1(5)        |
| Ni2 N4 | 1.855(14)       | N5 Ni2 N4  | 92.1(5)        |
| Ni2 N4 | 1.855(14)       | N5 Ni2 N4  | 87.9(5)        |
| N3 N4  | 1.329(16)       | N4 Ni2 N4  | 180.0          |
| N3-C5  | 1.314(18)       | C5 N3 N4   | 120.0(14)      |
| C12-N4 | 1.484(17)       | N2 N1 C11  | 109.4(8)       |
| N3 C5  | 1.294(12)       | N2 N1 Ni1  | 129.3(7)       |
| N5 C5  | 1.392(14)       | C12 N4 Ni2 | 122.4(9)       |
| N5 C8  | 1.344(14)       | C5 N3 Ni1  | 130.2(9)       |
| N5 C10 | 1.452(15)       | C5 N5 C8   | 122.1(11)      |
| O11 C7 | 1.214(14)       | C5 N5 C10  | 121.1(9)       |
| O10 C8 | 1.237(14)       | C8 N5 C10  | 116.7(10)      |
| C5 C6  | 1.408(15)       | N3 C5 N5   | 120.8(11)      |
| O3 C13 | 1.220(14)       | N3 C5 C6   | 119.9(10)      |
| C11 C1 | 1.364(14)       | N5 C5 C6   | 119.2(9)       |
| C11 C4 | 1.397(15)       | C1 C11 C4  | 121.3(10)      |
| N4 C8  | 1.354(16)       | C1 C11 N1  | 118.4(11)      |
| N4 C7  | 1.387(16)       | C4 C11 N1  | 120.2(9)       |
| N4 C9  | 1.505(13)       | C8 N4 C7   | 125.9(9)       |
| C1 C2  | 1.421(15)       | C8 N4 C9   | 117.4(10)      |

|         |           |            |           |
|---------|-----------|------------|-----------|
| C12 C2  | 1.380(16) | C7 N4 C9   | 116.6(12) |
| C12 C3  | 1.379(14) | C11 C1 C2  | 119.2(12) |
| C12 C13 | 1.474(16) | C2 C12 C3  | 118.3(10) |
| C6 C7   | 1.449(14) | C2 C12 C13 | 118.8(10) |
| C4 C3   | 1.389(15) | C3 C12 C13 | 122.9(12) |
| O4 C13  | 1.266(15) | N2 C6 C5   | 124.4(8)  |
|         |           | N2 C6 C7   | 115.2(11) |
|         |           | C5 C6 C7   | 119.6(10) |
|         |           | C3 C4 C11  | 117.9(9)  |
|         |           | C12 C2 C1  | 120.6(10) |
|         |           | O10 C8 N4  | 121.1(10) |
|         |           | O10 C8 N5  | 120.7(13) |
|         |           | N4 C8 N5   | 118.2(11) |
|         |           | O11 C7 N4  | 121.2(10) |
|         |           | O11 C7 C6  | 124.1(12) |
|         |           | N4 C7 C6   | 114.7(12) |
|         |           | C4 C3 C12  | 122.7(12) |
|         |           | O3 C13 O4  | 122.4(12) |
|         |           | O3 C13 C12 | 121.3(13) |
|         |           | O4 C13 C12 | 116.3(11) |

**Table S3** Results from TD-DFT calculation on **L1**

| Compound | Electronic Transitions          | Energy <sup>a</sup> (eV) | Wavelength (nm) | f <sup>b</sup> | Transitions involved              |
|----------|---------------------------------|--------------------------|-----------------|----------------|-----------------------------------|
| L1       | S <sub>0</sub> → S <sub>1</sub> | 2.2434 eV                | 552.66 nm       | 0.0002         | HOMO → LUMO                       |
|          | S <sub>0</sub> → S <sub>2</sub> | 3.7392 eV                | 331.58 nm       | 0.5782         | HOMO-1 → LUMO<br>HOMO → LUMO + 1  |
|          | S <sub>0</sub> → S <sub>3</sub> | 3.8327 eV                | 323.49 nm       | 0.0477         | HOMO -1 → LUMO<br>HOMO → LUMO + 1 |

**Table S4** TD-DFT calculation results of N1

| Compound | Electronic Transitions          | Energy <sup>a</sup> (eV) | Wavelength (nm) | f <sup>b</sup> | Transitions involved                                                                      |
|----------|---------------------------------|--------------------------|-----------------|----------------|-------------------------------------------------------------------------------------------|
| N1       | S <sub>0</sub> → S <sub>1</sub> | 1.3068 eV                | 948.77 nm       | 0.0125         | HOMO-1 → LUMO<br>HOMO → LUMO<br>HOMO → LUMO + 1                                           |
|          | S <sub>0</sub> → S <sub>2</sub> | 1.6430 eV                | 754.60 nm       | 0.0053         | HOMO-3 → LUMO<br>HOMO-2 → LUMO<br>HOMO-1 → LUMO<br>HOMO-1 → LUMO+1<br>HOMO → LUMO         |
|          | S <sub>0</sub> → S <sub>3</sub> | 1.7957 eV                | 690.46 nm       | 0.0198         | HOMO-3 → LUMO<br>HOMO-2 → LUMO + 2<br>HOMO → LUMO<br>HOMO → LUMO + 1<br>HOMO-1 → LUMO + 9 |

**Table S5. Structural parameters of L1 derived from TDDFT studies**

|                                  |                    |
|----------------------------------|--------------------|
| Multiplicity                     | 1                  |
| Number of electrons              | 158                |
| Number of alpha electrons        | 79                 |
| Number of beta electrons         | 79                 |
| Number of basis functions        | 224                |
| Number of independent functions  | 224                |
| Number of point charges in /Mol/ | 0                  |
| Number of translation vectors    | 0                  |
| Number of Atoms                  | 35                 |
| Calculation Type                 | SP                 |
| Calculation Method               | RB3LYP TD-FC       |
| Basis Set                        | 3-21G              |
| Charge                           | 0                  |
| Spin                             | Singlet            |
| Solvation                        | None               |
| E(TD-HF/TD-DFT)                  | -1071.7464 Hartree |
| RMS Gradient Norm                | 0 Hartree/Bohr     |

|               |                 |
|---------------|-----------------|
| Dipole Moment | 4.6361928 Debye |
| Point Group   | C1              |

**Table S6. Structural and relevant parameters of N1 derived from TDDFT studies**

|                                  |     |
|----------------------------------|-----|
| Multiplicity                     | 1   |
| Number of electrons              | 342 |
| Number of alpha electrons        | 171 |
| Number of beta electrons         | 171 |
| Number of basis functions        | 473 |
| Number of independent functions  | 473 |
| Number of point charges in /Mol/ | 0   |

|                               |                    |
|-------------------------------|--------------------|
| Number of translation vectors | 0                  |
| Number of Atoms               | 69                 |
| Calculation Type              | SP                 |
| Calculation Method            | RTD-B3LYP-FC       |
| Basis Set                     | 6-31G              |
| Charge                        | 0                  |
| Spin                          | Singlet            |
| Solvation                     | None               |
| E(TD-HF/TD-DFT)               | -3643.382 Hartree  |
| RMS Gradient Norm             | 0 Hartree/Bohr     |
| Dipole Moment                 | 0.0028231188 Debye |
| Point Group                   | C1                 |

**Table S7. Structural and other parameters for N1- *p*-NPP interaction derived from TDDFT studies**

|                     |     |
|---------------------|-----|
| Multiplicity        | 1   |
| Number of electrons | 454 |

|                                  |         |
|----------------------------------|---------|
| Number of alpha electrons        | 227     |
| Number of beta electrons         | 227     |
| Number of basis functions        | 615     |
| Number of independent functions  | 615     |
| Number of point charges in /Mol/ | 0       |
| Number of translation vectors    | 0       |
| Number of Atoms                  | 89      |
| Calculation Type                 | SP      |
| Calculation Method               | FOPT    |
| Basis Set                        | 3-21G   |
| Charge                           | 0       |
| Spin                             | Singlet |

|                   |                       |
|-------------------|-----------------------|
| Solvation         | None                  |
| E(TD-HF/TD-DFT)   | -4741.384978 Hartree  |
| RMS Gradient Norm | 0.000759 Hartree/Bohr |
| Dipole Moment     | 12.717439 Debye       |
| Point Group       | C1                    |

### **B. Justification for alerts at level A and B for N1**

Alert level A

PLAT417\_ALERT\_2\_A Short Inter D-H..H-D H1B ..H2B . 1.70 Ang. -1+x,y,z = 1\_455  
 PLAT417\_ALERT\_2\_A Short Inter D-H..H-D H3D ..H3D . 1.74 Ang. 1-x,1-y,2-z = 2\_667  
 PLAT417\_ALERT\_2\_A Short Inter D-H..H-D H4D ..H6A . 1.72 Ang. x,y,z = 1\_555  
 PLAT417\_ALERT\_2\_A Short Inter D-H..H-D H5A ..H6A . 1.08 Ang. x,y,z = 1\_555  
 PLAT417\_ALERT\_2\_A Short Inter D-H..H-D H5B ..H6A . 1.70 Ang. x,y,z = 1\_555  
 PLAT417\_ALERT\_2\_A Short Inter D-H..H-D H6B ..H7B . 1.14 Ang. x,y,z = 1\_555

**Hydrogen atoms were placed in calculated positions and refined more times. The short H··H contacts arise from idealized hydrogen geometry and do not represent significant intermolecular interactions.**

Alert level B

ALERT\_3\_B Ratio Observed / Unique Reflections (too) Low .. 37%

**These alerts are generated because the crystal used here is not of very high quality although we have made several attempts to obtain better quality crystal but every time the data we have similar crystallographic issue . Besides the diffraction quality of the crystal is weak. Despite this, the molecular structure and connectivity are clearly established.**

ALERT\_3\_B Poor Data / Parameter Ratio.....6.66

**The alarm of poor data/parameter ratio is due to the crystal which diffracted quite weakly at high angle.**

ALERT\_2\_B ADP of Atom O6 is N.P.D. or (nearly) 2D.

**The ADP of atom O6 appears slightly non-positive definite due to weak electron density associated with a solvent molecule and possible thermal motion.**

ALERT\_2\_B Atom O11 has ADP max/min Ratio ..... 4.4 prolate

These alerts are generated because the crystal used here is not of very high quality although we have made several attempts to obtain better quality data but every time we have similar crystallographic issue, besides this there is a large amount of disorder in the structure due to thermal motion.

ALERT\_3\_B Low Bond Precision on C-C Bonds ..... 0.01989

**This alert is generated because there is a large amount of disorder in the structure due to thermal motion. Nevertheless, the connectivity and overall molecular geometry are well established.**

ALERT\_2\_B Short Inter D-H..H-D H3D ..H6B . 1.91 Ang. x,y,z = 1\_555

.ALERT\_2\_B Short Inter D-H..H-D H6A ..H7B . 2.07 Ang. x,y,z = 1\_55

**Hydrogen atoms were placed in calculated positions and refined more times. The short H···H contacts arise from the idealized geometry of the hydrogen atoms and are not chemically significant.**

ALERT\_2\_B D-H Bond Without Acceptor O7 --H7A

**Atom O7 corresponds to a solvent molecule and the hydrogen atom H7A which does not participate in a significant hydrogen bond interaction in the crystal packing.**

ALERT\_3\_B Missing FCF Reflection(s) Below Theta(Min)[Deg]= 5.15 Note

1 0 0, -1 1 0, 0 1 0, 1 1 0, 0 2 0, -1 -1 1, 0 -1 1, 1 -1 1, -1 0 1, 0 0 1, 1 0 1, -1 1 1, 0 1 1, 1 1 1, 0 2 1, -1 -1 2, 0 -1 2, 1 -1 2, -1 0 2, 0 0 2, 1 0 2, -1 1 2, 0 1 2, 1 1 2, ( 5 More Missing: see the .ckf listing file)

ALERT\_3\_B Missing FCF Refl Between Thmin & STh/L= 0.578 1365 Report

2 0 0, 2 1 0, 3 1 0, 4 1 0, -7 2 0, -2 2 0, 1 2 0, 2 2 0, 8 2 0, -5 3 0, 1 3 0, 2 3 0, 3 3 0, 4 3 0, 6 3 0, 7 3 0, 8 3 0, 0 4 0, 1 4 0, 2 4 0, 3 4 0, 4 4 0, 5 4 0, 6 4 0, 7 4 0, 8 4 0, -1 5 0, 1 5 0, 2 5 0, 3 5 0, ( 1335 More Missing: see the .ckf listing file)

Some reflections are missing in the FCF file because very weak reflections were omitted during data reduction. The structure refinement was performed using the available reflections and the overall data completeness and refinement statistics remain satisfactory.
